# Supplementary material for: The LIN28B/TGF-β/TGFBI feedback loop promotes cell migration and tumour initiation potential in cholangiocarcinoma
Source: PubMed Central journal article supplement (PMC9113936; doi:10.1038/s41417-021-00387-5), 2021-09-21

Figure 4b, western blot; p-Smad2, Smad2, TGFBI, TGFBR1

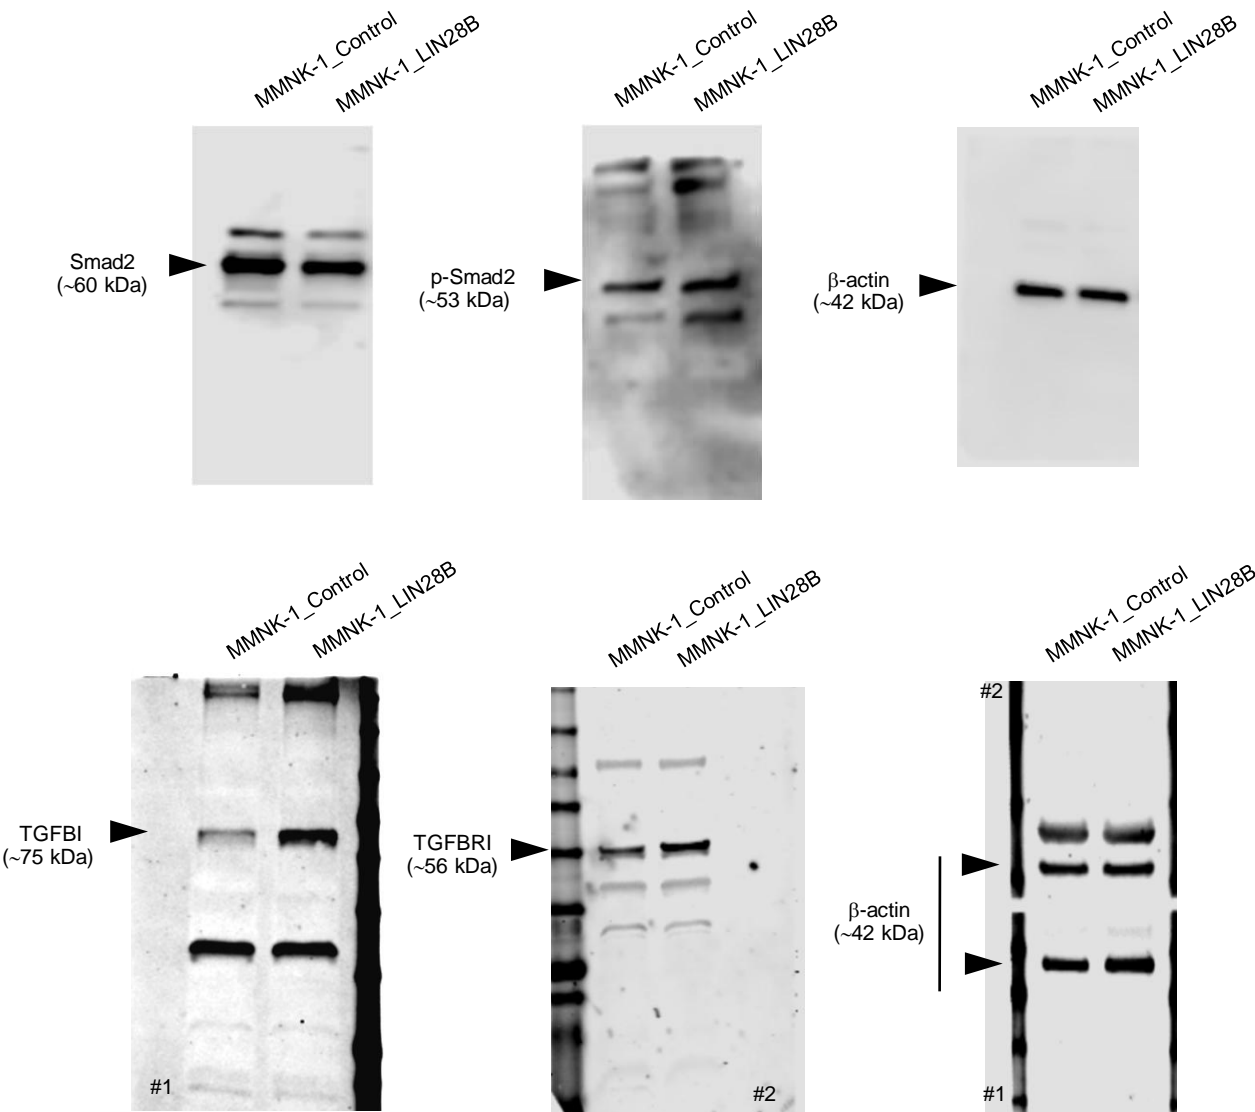

**Figure 4d, western blot; TGFBI**

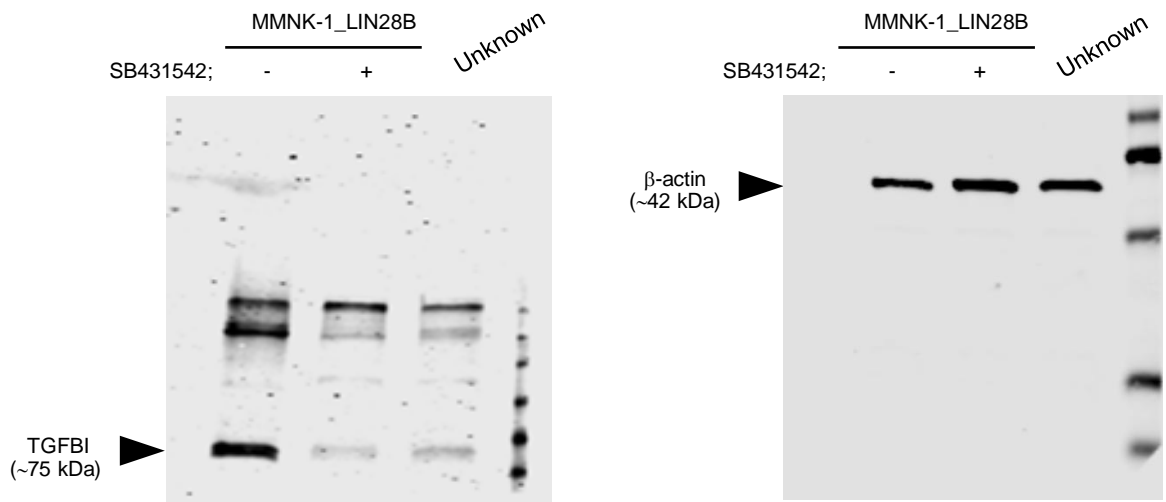

Figure 5a, western blot; LIN28B, Smad2, p-Smad2, TGFBI, TGFBR1

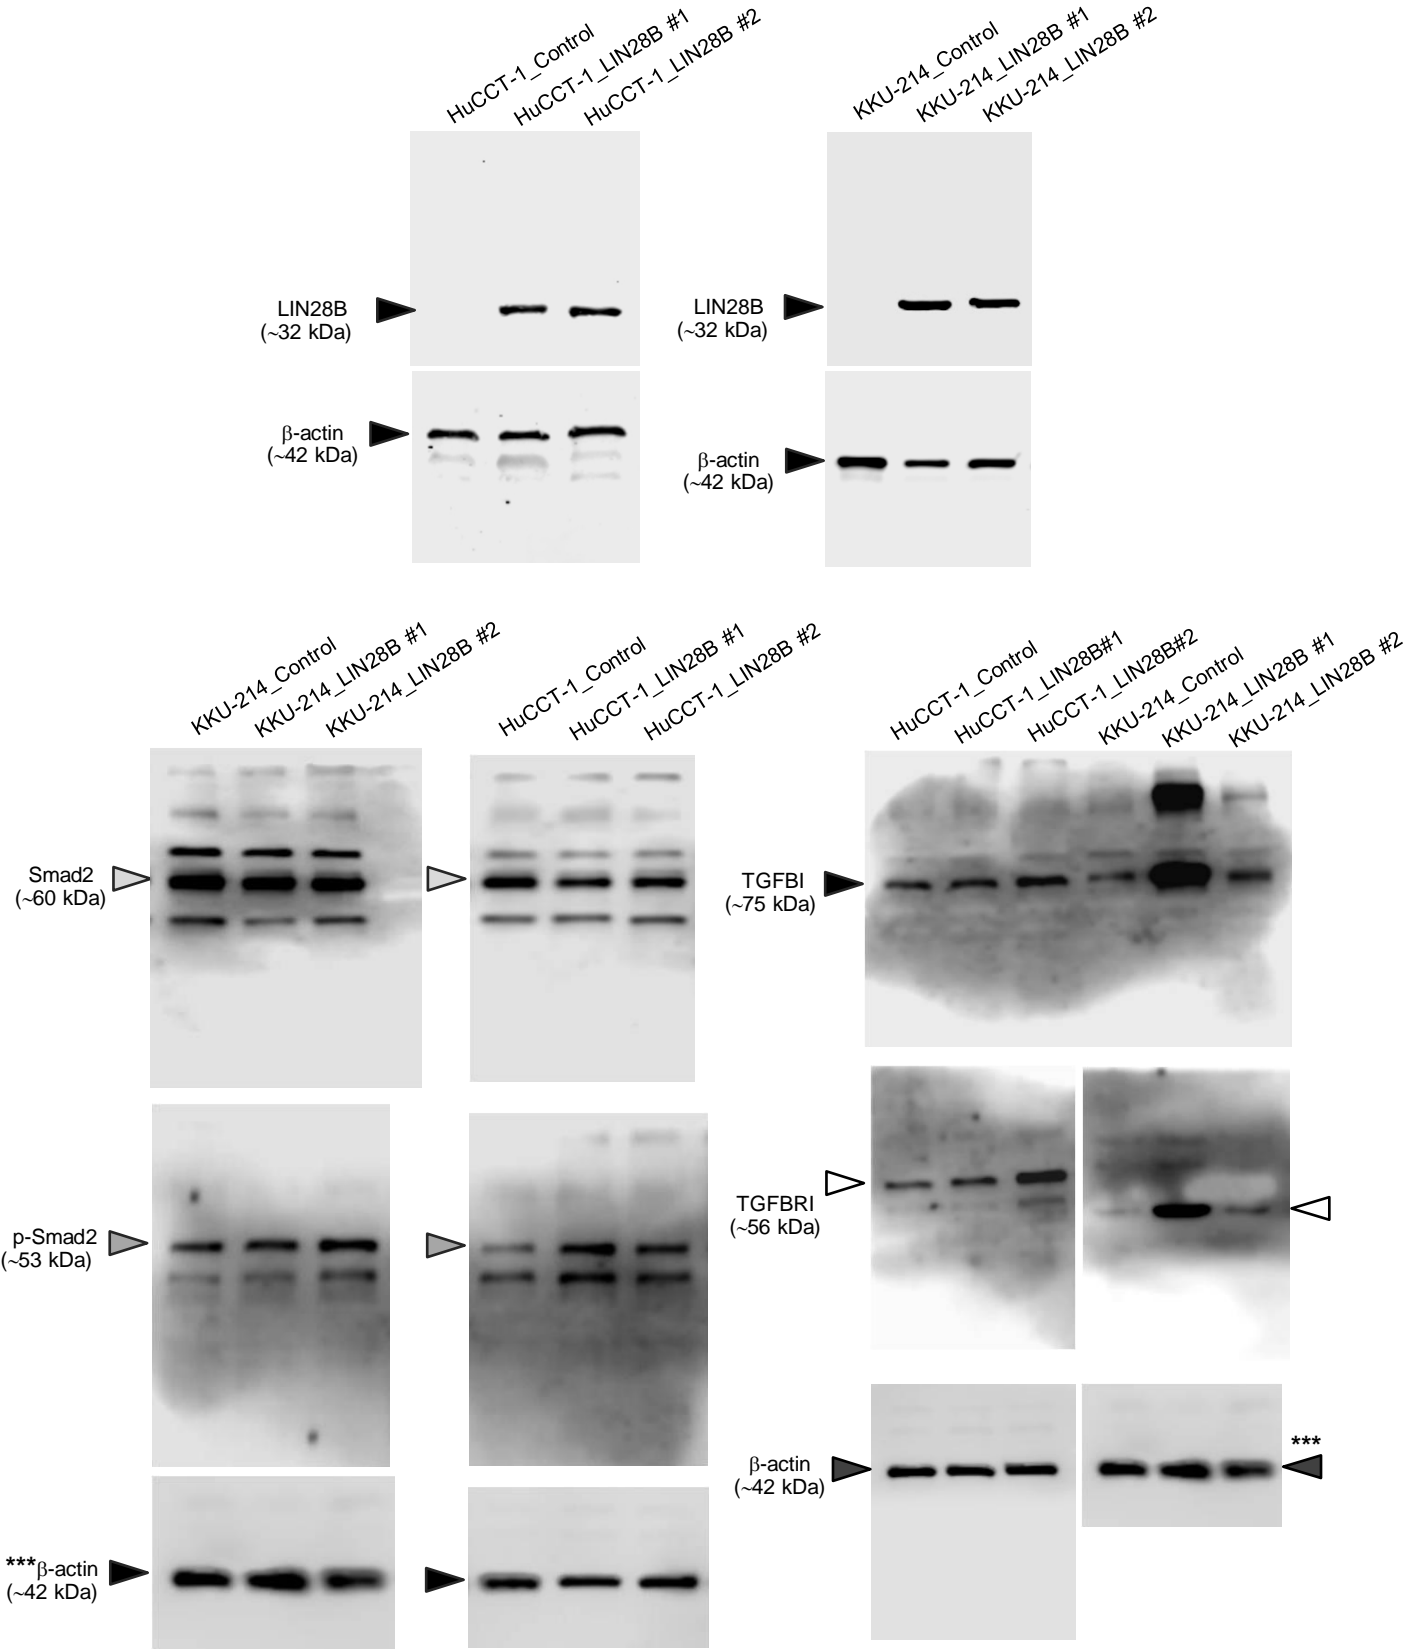

Figure 6a, western blot; TGFBI

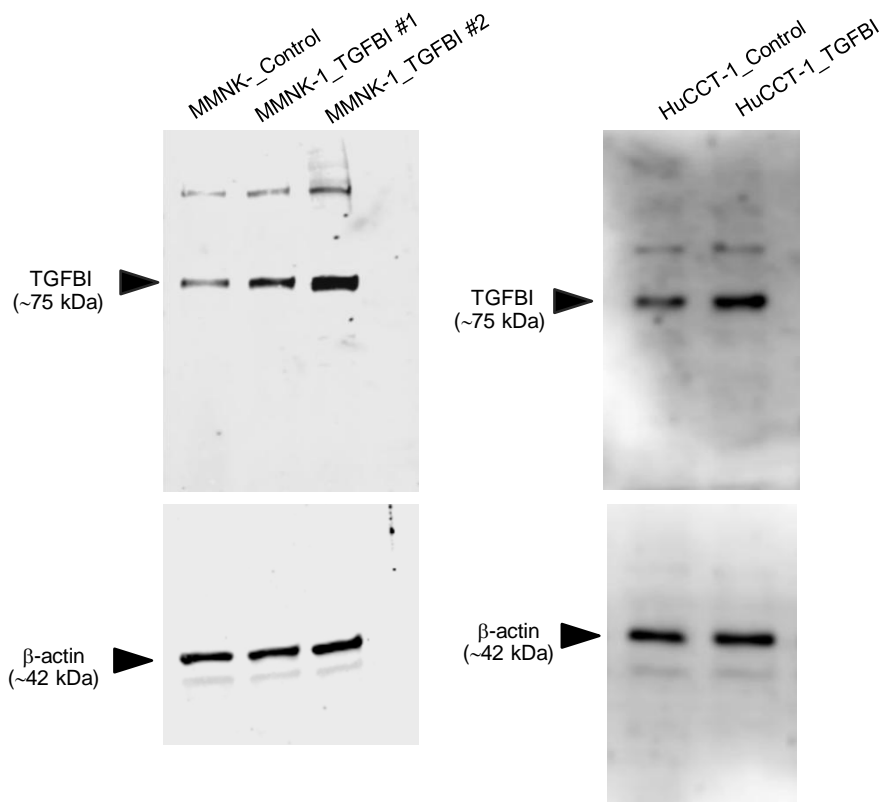

Supplementary figure 1a, western blot; LIN28B

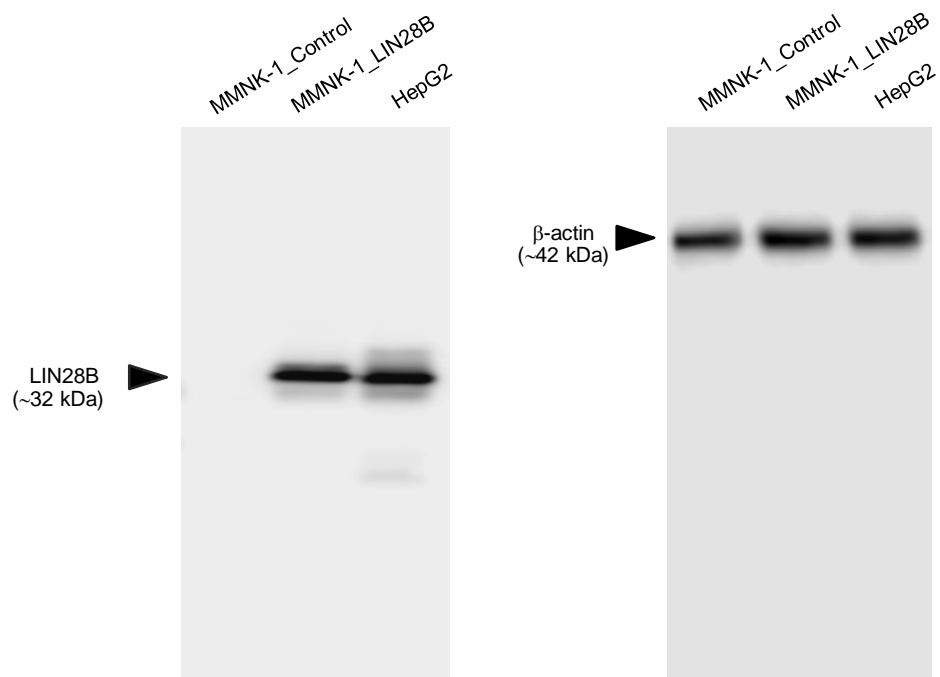

Supplementary information, western blot; Fibronectin

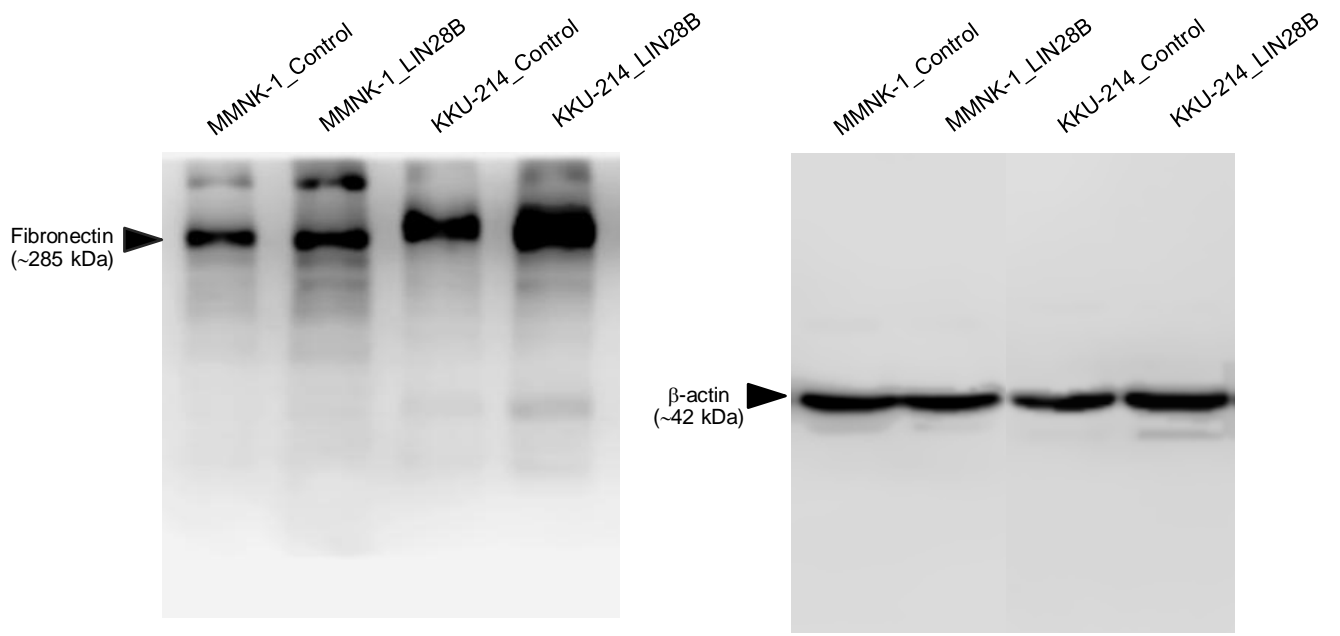

Supplement: 41417_2021_387_MOESM9_ESM.pdf [file 41417_2021_387_MOESM9_ESM.pdf]
